# Supplementary material
Source: PubMed Central journal article supplement (PMC3757685)
Supplement: mmc1.pdf [file mmc1.pdf]

## Supplemental Figure 1

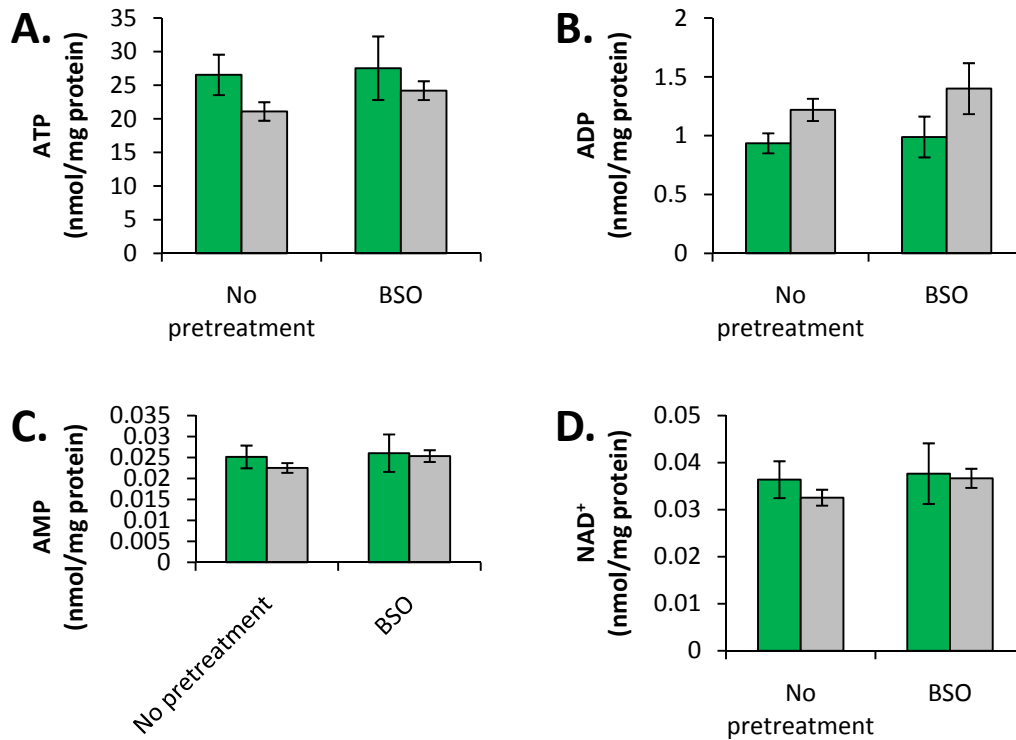

**Supplemental Figure 1: Effect of BSO and DMNQ on adenine and pyridine nucleotides.** BAEC were treated with BSO (50  $\mu$ M) for 18 h, and then BSO-containing media was removed prior to treatment with (gray bars) or without (green bars) DMNQ (20  $\mu$ M) for an additional 4 h. Cells were harvested for HPLC analysis of ATP (A), ADP (B), AMP (C), and NAD<sup>+</sup> (D), and results were normalized to total protein per sample. Values represent mean  $\pm$ SEM, n=3. There were not statistically significant differences between groups.
